# Supplementary material for: The use of 1,2-dipiperidinoacetylene for the preparation of monometallic diaminoacetylene and homo- or heterobimetallic diaminodicarbene ruthenium(ii) complexes
Source: Royal Society of Chemistry journal article supplement (doi:10.1039/c1dt10606f), 2011-01-01
Supplement: c1dt10606f.pdf [file c1dt10606f.pdf]

## Supporting Information for

# **The use of 1,2-dipiperidinoacetylene for the preparation of monometallic diaminoacetylene and homo- or heterobimetallic diaminodicarbene ruthenium(II) complexes**

Alex R. Petrov, Thomas Bannenberg, Constantin G. Daniliuc, Peter G. Jones,  
and Matthias Tamm\*<sup>a</sup>

<sup>a</sup>Institut für Anorganische und Analytische Chemie, Technische Universität  
Braunschweig, Hagenring 30, D-38106 Braunschweig, Germany.

### **Contents:**

#### **Computational Details**

- Comparison of theoretical and experimental results
- Structures and XYZ coordinates

## Computational Details

For the cationic ruthenium complex **4** all computations were performed using the DFT functional methods M06-L, BP86 and B3LYP as implemented in the Gaussian09 program.<sup>[1]</sup> The all-electron double- $\zeta$  basis set (6-31+G\*\*)<sup>[2]</sup> was applied for all main-group elements (C, H, N, P and Cl), together with the effective core potential double- $\zeta$  basis set (Stuttgart RSC 1997 ECP) for the transition metal (Ru).<sup>[3]</sup> For the optimization of the diaminoacetylene (**1**) the Møller–Plesset perturbation method (MP2)<sup>[4]</sup> has been used in combination with the correlation-consistent polarized triple- $\zeta$  basis set (cc-pVTZ).<sup>[5]</sup>

- [1] Gaussian 09, Revision A.1, M. J. Frisch, G. W. Trucks, H. B. Schlegel, G. E. Scuseria, M. A. Robb, J. R. Cheeseman, G. Scalmani, V. Barone, B. Mennucci, G. A. Petersson, H. Nakatsuji, M. Caricato, X. Li, H. P. Hratchian, A. F. Izmaylov, J. Bloino, G. Zheng, J. L. Sonnenberg, M. Hada, M. Ehara, K. Toyota, R. Fukuda, J. Hasegawa, M. Ishida, T. Nakajima, Y. Honda, O. Kitao, H. Nakai, T. Vreven, J. A. Montgomery, Jr., J. E. Peralta, F. Ogliaro, M. Bearpark, J. J. Heyd, E. Brothers, K. N. Kudin, V. N. Staroverov, R. Kobayashi, J. Normand, K. Raghavachari, A. Rendell, J. C. Burant, S. S. Iyengar, J. Tomasi, M. Cossi, N. Rega, J. M. Millam, M. Klene, J. E. Knox, J. B. Cross, V. Bakken, C. Adamo, J. Jaramillo, R. Gomperts, R. E. Stratmann, O. Yazyev, A. J. Austin, R. Cammi, C. Pomelli, J. W. Ochterski, R. L. Martin, K. Morokuma, V. G. Zakrzewski, G. A. Voth, P. Salvador, J. J. Dannenberg, S. Dapprich, A. D. Daniels, Ö. Farkas, J. B. Foresman, J. V. Ortiz, J. Cioslowski, and D. J. Fox, Gaussian, Inc., Wallingford CT, 2009.
- [2] X. Cao and M. Dolg, *J. Chem. Phys.* 2001, **115**, 7348.
- [3] (a) A. Bergner, M. Dolg, W. Kuechle, H. Stoll, H. Preuss, *Mol. Phys.* **1993**, *80*, 1431; (b) M. Kaupp, P. v. R. Schleyer, H. Stoll, H. Preuss, *J. Chem. Phys.* **1991**, *94*, 1360; (c) M. Dolg, H. Stoll, H. Preuss, R. M. Pitzer, *J. Phys. Chem.* **1993**, *97*, 5852.
- [4] (a) M. Head-Gordon, J. A. Pople, M. J. Frisch, *Chem. Phys. Lett.* 1988, *153*, 503; (b) S. Saebo, J. Almlöf, *Chem. Phys. Lett.* 1989, *154*, 83; (c) M. J. Frisch, M. Head-Gordon, J. A. Pople, *Chem. Phys. Lett.* **1990**, *166*, 275; (d) M. J. Frisch, M. Head-Gordon, J. A. Pople, *Chem. Phys. Lett.* **1990**, *166*, 281; (e) M. Head-Gordon, T. Head-Gordon, *Chem. Phys. Lett.* **1994**, *220*, 122.
- [5] T. H. Dunning, Jr., *J. Chem. Phys.* **1989**, *90*, 1007.

**Table 1.** Selected bond lengths and angles in diaminoacetylene **1**.

|           |                 |          | MP2     |
|-----------|-----------------|----------|---------|
| Basis set |                 |          | cc-pVTZ |
| Geometry  | Bond length [Å] | C1-C2    | 1.221   |
|           |                 | C1-N1    | 1.351   |
|           |                 | C2-N2    | 1.352   |
|           | Bond angles [°] | C1-C2-N2 | 177.4   |
|           |                 | C2-C1-N1 | 177.8   |

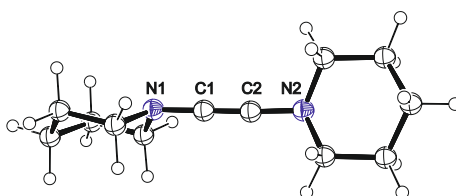

**Structure of 1 (atom, x-, y-, z-positions in Å):**

| MP2/cc-pVTZ |           |           |           |
|-------------|-----------|-----------|-----------|
| N           | -1.953700 | -0.215000 | -0.172700 |
| N           | 1.953200  | -0.212300 | 0.171700  |
| C           | -0.607400 | -0.168400 | -0.064500 |
| C           | 0.607000  | -0.164000 | 0.061500  |
| C           | -2.564200 | 1.009300  | -0.698700 |
| C           | -4.018100 | 0.754700  | -1.060400 |
| C           | -4.784300 | 0.224200  | 0.146200  |
| C           | -4.095500 | -1.019300 | 0.697300  |
| C           | -2.639800 | -0.724300 | 1.018700  |
| C           | 2.640300  | -0.725400 | -1.017500 |
| C           | 4.095100  | -1.021700 | -0.693200 |
| C           | 4.784900  | 0.222000  | -0.144000 |
| C           | 4.017500  | 0.756800  | 1.059900  |
| C           | 2.564600  | 1.012700  | 0.695000  |
| H           | -1.986900 | 1.314700  | -1.569200 |
| H           | -2.500400 | 1.815200  | 0.048200  |
| H           | -4.054900 | 0.023000  | -1.869700 |
| H           | -4.465300 | 1.679400  | -1.427600 |
| H           | -4.811200 | 0.984400  | 0.922300  |
| H           | -5.818000 | 0.004000  | -0.121600 |
| H           | -4.598400 | -1.374000 | 1.597900  |
| H           | -4.135500 | -1.820200 | -0.043400 |
| H           | -2.578100 | 0.012300  | -1.834100 |
| H           | -2.115000 | -1.621900 | 1.339700  |
| H           | 2.581000  | 0.009300  | -1.834800 |
| H           | 2.114700  | -1.623000 | -1.337200 |
| H           | 4.598900  | -1.379400 | -1.592300 |
| H           | 4.132700  | -1.820900 | 0.049500  |
| H           | 5.817800  | 0.000900  | 0.126100  |
| H           | 4.814300  | 0.990300  | -0.922100 |
| H           | 4.465500  | 1.681700  | 1.425500  |
| H           | 4.051700  | 0.027100  | 1.871200  |
| H           | 1.986300  | 1.321700  | 1.563600  |
| H           | 2.503500  | 1.816600  | -0.054400 |

**Table 2.** Comparison of theoretical with experimental results of complex **4**.

|            |                               |                         | X-ray <sup>[a]</sup>      | DFT                                                         |         |         |         |         |         |
|------------|-------------------------------|-------------------------|---------------------------|-------------------------------------------------------------|---------|---------|---------|---------|---------|
| Functional |                               |                         |                           | M06-L                                                       |         | BP86    |         | B3LYP   |         |
| Spin state |                               |                         |                           | singlet                                                     | triplet | singlet | triplet | singlet | triplet |
| Basis set  |                               |                         |                           | 6-31+G** (MGE) <sup>[b]</sup> , Stuttgart RSC 1997 ECP (Ru) |         |         |         |         |         |
| Geometry   | Bond length [Å]               | C1-C2                   | 1.399(2) / 1.404(2)       | 1.388                                                       | 1.322   | 1.405   | 1.337   | 1.405   | 1.327   |
|            |                               | C1-N1                   | 1.301(2) / 1.298(2)       | 1.316                                                       | 1.338   | 1.328   | 1.353   | 1.318   | 1.342   |
|            |                               | C2-N2                   | 1.303(2) / 1.303(2)       | 1.312                                                       | 1.332   | 1.322   | 1.342   | 1.313   | 1.334   |
|            |                               | Ru-C1                   | 1.9188(15) / 1.9265(16)   | 1.910                                                       | 2.025   | 1.923   | 2.036   | 1.914   | 2.032   |
|            |                               | Ru-C2                   | 1.9215(15) / 1.9174(16)   | 1.910                                                       | 2.018   | 1.936   | 2.043   | 1.929   | 2.043   |
|            |                               | Ru-Cl                   | 2.3840(4) / 2.3856(4)     | 2.408                                                       | 2.382   | 2.388   | 2.371   | 2.412   | 2.385   |
|            |                               | Ru-P1                   | 2.3836(4) / 2.3839(4)     | 2.418                                                       | 2.432   | 2.429   | 2.445   | 2.455   | 2.476   |
|            |                               | Ru-P2                   | 2.3890(4) / 2.3959(4)     | 2.423                                                       | 2.419   | 2.433   | 2.439   | 2.459   | 2.478   |
|            | Bond angles [°]               | C1-C2-N2                | 146.27(15) / 148.11(15)   | 148.4                                                       | 151.5   | 148.8   | 151.1   | 146.3   | 149.5   |
|            |                               | C2-C1-N1                | 147.23(15) / 146.56(16)   | 148.4                                                       | 151.0   | 148.1   | 151.2   | 147.5   | 149.7   |
|            |                               | P1-Ru-P2                | 175.422(13) / 174.475(14) | 170.6                                                       | 173.1   | 169.7   | 173.9   | 169.4   | 172.7   |
|            |                               | P1-Ru-Cl                | 87.995(12) / 86.253(14)   | 86.5                                                        | 88.6    | 84.8    | 87.0    | 84.7    | 86.6    |
| P2-Ru-Cl   |                               | 87.429(12) / 89.294(14) | 86.4                      | 88.7                                                        | 85.0    | 86.8    | 84.8    | 86.1    |         |
| Energies   | $\Delta E_{S-T}$ [kcal/mol]   |                         |                           | -22.6                                                       |         | -27.4   |         | -22.1   |         |
|            | $\Delta E_{LUMO-HOMO}$ [eV]   |                         |                           | 1.52                                                        | ---     | 1.38    | ---     | 3.08    | ---     |
|            | $\Delta E_{SOMO-SOMO-1}$ [eV] |                         |                           | ---                                                         | 1.74    | ---     | 1.79    | ---     | 1.68    |

<sup>[a]</sup> [4]Cl / [4](BPh<sub>4</sub>)

<sup>[b]</sup> MGE = main group elements

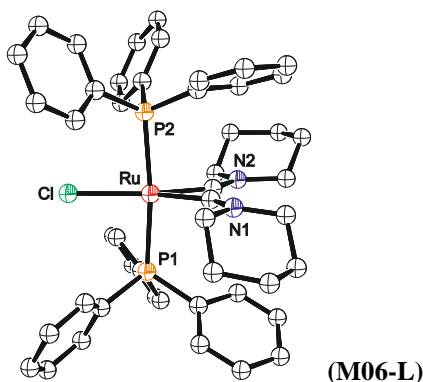

Structure of the cation 4 (S = 0) (atom, x-, y-, z-positions in Å):

| singlet                          |                                 |                                 |
|----------------------------------|---------------------------------|---------------------------------|
| M06-L                            | BP86                            | B3LYP                           |
| Ru -0.029200 -0.230600 -0.487200 | Ru -0.005700 -0.448600 0.052700 | Ru -0.006000 -0.443500 0.043000 |
| Cl -0.065300 -0.631900 -2.861000 | Cl -0.003500 -2.818000 0.352700 | Cl -0.002400 -2.836800 0.344500 |
| N -0.165100 1.948200 1.663000    | N 0.049600 2.144500 1.725700    | N 0.025900 2.124700 1.731800    |
| P 0.069900 -1.622900 2.235300    | P 0.032500 2.063800 -1.939200   | P 0.034600 1.994000 -1.875600   |
| P 2.351600 0.140100 -0.741500    | P 2.404200 -0.689700 -0.133000  | P -2.450300 -0.649800 0.208600  |
| P -2.440100 -0.397800 -0.570300  | P -2.424900 -0.642200 0.231200  | P 2.429900 -0.691800 -0.130400  |
| C -0.071400 0.735700 1.159900    | C 0.031400 1.382700 0.638500    | C 0.026200 1.371000 0.650300    |
| C 0.034300 -0.630400 1.379600    | C -0.008000 1.306300 -0.764300  | C -0.002800 1.313300 -0.753500  |
| C -0.171000 2.283800 3.092100    | C -0.031900 3.622600 1.759800   | C -0.087900 3.596200 1.776500   |
| C -1.309100 3.239500 3.427900    | C 1.097000 4.225500 2.617200    | C 1.026600 4.210400 2.630700    |
| C -1.310100 4.456900 2.512000    | C 1.118700 3.599900 4.025800    | C 1.063400 3.590200 4.033400    |
| C -1.343200 4.021300 1.052900    | C -0.991300 3.236600 -1.937300  | C 1.155000 2.059900 3.943800    |
| C -0.177000 3.100200 0.744900    | C 0.057000 1.502400 3.066200    | C 0.036400 1.484200 3.068900    |
| C 0.289900 -1.506800 3.683400    | C 0.136400 3.434700 -2.073500   | C 0.189300 3.456700 -2.015300   |
| C 1.639400 -2.103300 4.063500    | C -0.975700 3.978400 -2.987100  | C -0.903600 4.044000 -2.916800  |
| C 1.775500 -3.576100 3.561900    | C -0.991300 3.236600 -1.937300  | C -0.936700 3.335600 -2.273000  |
| C 1.508600 -3.617400 2.064100    | C -1.104200 3.119500 -4.118200  | C -1.073800 3.817700 -4.092200  |
| C 0.160000 -3.002400 1.727700    | C 0.007900 1.211700 -3.186800   | C 0.019800 1.271300 -3.168100   |
| C 2.685900 1.827600 -1.364200    | C -3.083300 -0.935400 1.941600  | C -3.109500 -0.973100 1.906500  |
| C 1.784400 2.385900 -2.282200    | C -2.343600 -1.748400 2.830200  | C -2.362100 -1.765100 2.795000  |
| C 1.983700 3.673400 -2.770600    | C -2.836700 -2.020400 4.116900  | C -2.856000 -2.057000 4.069000  |
| C 3.082100 4.420900 -2.348600    | C -4.066200 -1.481900 4.535100  | C -4.097100 -1.558200 4.475800  |
| C 3.990300 3.869100 -1.447000    | C -4.808300 -0.675100 3.655700  | C -4.848800 -0.772900 3.597600  |
| C 3.787900 2.578300 -0.954400    | C -4.323700 -0.404200 2.364200  | C -4.361300 -0.483300 2.323700  |
| C 3.309900 0.053000 0.819400     | C -3.363800 -0.861500 -0.330600 | C -3.387600 0.857900 -0.328300  |
| C 3.124500 1.041800 1.798100     | C -3.278100 2.058000 0.419100   | C -3.322400 2.030000 0.446600   |
| C 3.822200 0.994200 3.001000     | C -3.958100 3.214100 0.003300   | C -3.997700 3.186100 0.054900   |
| C 4.715300 -0.471500 -3.890800   | C -4.729600 3.106300 -1.753300  | C -4.752300 3.194600 -1.124800  |
| C 4.898400 -1.041500 2.291800    | C -4.817700 2.012800 -1.237000  | C -4.824800 2.036800 -1.901200  |
| C 4.202300 -0.992900 1.083500    | C -4.142700 0.851900 -1.506000  | C -4.149300 0.876000 -1.506500  |
| C 3.221300 -1.006200 -1.852300   | C -3.147100 -2.000200 -0.793800 | C -3.151400 -1.988700 -0.846000 |
| C 4.339400 -0.607600 -2.591700   | C -4.284100 -2.722100 -0.373900 | C -4.282800 -2.720500 -0.455400 |
| C -1.017600 -1.533400 -3.380800  | C -4.835500 -1.135000 -1.479400 | C -4.814900 -1.689400 -0.929500 |
| C 4.587500 -2.857800 -3.431500   | C -4.261500 -3.989800 -2.456100 | C -4.226300 -3.955600 -2.540100 |
| C 3.471500 -3.258800 -2.698000   | C -3.125500 -3.276300 -2.877000 | C -3.095900 -3.233400 -2.933800 |
| C 2.785200 -2.335100 -1.916700   | C -2.566800 -2.292000 -2.047100 | C -2.558200 -2.261700 -2.088700 |
| C -1.181800 1.202700 -1.041700   | C 3.294200 0.907400 1.479400    | C 3.298700 -0.945100 1.482100   |
| C -2.465900 2.018800 -1.929400   | C 2.663000 -1.635400 2.513300   | C 2.657300 -1.675800 2.497200   |
| C -2.979400 3.250200 -2.324200   | C 3.326500 -1.853900 3.732100   | C 3.304300 -1.915300 3.712100   |
| C -4.210000 3.684300 -1.832600   | C 4.620800 -1.344300 3.926400   | C 4.595000 -1.426500 3.932600   |
| C -4.931300 2.877700 -0.954400   | C 5.255000 -0.620600 -0.912100  | C 5.229800 -0.701400 -0.927900  |
| C -4.423400 1.641600 -0.559900   | C 4.599000 -0.404100 1.687700   | C 4.600000 -0.463200 1.709000   |
| C -3.124400 -0.779500 1.082100   | C 3.261200 0.770000 -0.901700   | C 3.297200 0.777700 -0.857100   |
| C -3.188400 0.211100 2.075800    | C 3.322000 1.993800 -0.195600   | C 3.353300 1.980000 -0.129300   |
| C -3.488400 -0.101900 3.385400   | C 3.839600 3.118900 -0.476500   | C 3.877100 3.106600 -0.161600   |
| C -3.830400 -1.411400 3.724800   | C 4.495900 3.042700 -2.055900   | C 4.547200 3.061600 -1.938800   |
| C -3.824600 -2.400500 2.744100   | C 4.433700 1.833200 -2.767100   | C 4.491400 1.875200 -2.672700   |
| C -3.473300 -2.089000 1.431000   | C 3.823100 0.702000 -2.194400   | C 3.873300 0.739700 -2.136000   |
| C -3.169800 -1.659900 -1.657500  | C 2.962000 -2.083000 -1.179100  | C 2.979500 -2.087400 -1.200900  |
| C -2.457300 -2.840700 -1.898400  | C 2.199900 -2.469400 -2.310900  | C 2.224200 -2.422000 -2.335800  |
| C -3.025200 -3.856800 -2.660600  | C 2.633100 -3.502000 -3.157100  | C 2.647100 -3.438400 -3.193700  |
| C -4.300700 -3.694500 -3.199400  | C 3.823800 -4.139500 -2.872300  | C 3.823000 -4.142900 -2.919300  |
| C -5.008400 -2.515700 -2.974200  | C 4.578500 -3.846800 -1.393700  | C 4.573200 -3.824500 -1.784800  |
| C -4.447500 -1.500000 -2.204400  | C 4.153700 -2.807100 -0.895400  | C 4.156000 -2.801100 -0.929300  |
| C 0.797600 2.748800 3.334200     | H -1.016300 3.893400 2.193000   | H -1.067400 3.89400 2.212400    |
| H -0.247900 1.352600 3.657100    | H -0.004600 3.997300 0.727700   | H -0.075400 3.980500 0.759300   |
| H -2.265000 2.709100 3.331600    | H 2.066100 4.029200 2.612300    | H 1.990600 4.028600 2.608000    |
| H -1.218200 3.533500 4.478500    | H 0.952500 5.316300 2.670300    | H 0.860500 5.295900 2.689300    |
| H -0.406500 5.055200 2.694900    | H 0.201700 3.896000 4.572600    | H 0.153200 3.871900 4.581200    |
| H -2.161200 5.103000 2.745000    | H 1.971600 3.995100 4.603900    | H 1.908100 3.991000 4.603200    |
| H -1.305200 4.882400 0.378900    | H 1.121600 1.607700 0.602000    | H 1.074500 1.607400 0.613000    |
| H -2.282400 3.492300 0.831100    | H 2.163200 1.750100 3.510900    | H 2.125600 1.761900 3.527600    |
| H -0.209700 2.694300 -0.271200   | H 0.149200 0.417600 2.900600    | H 0.146600 0.410500 2.915100    |
| H 0.781600 3.632500 0.862000     | H -0.926400 1.699900 3.538700   | H -0.942900 1.665500 3.533800   |
| H -0.533400 -2.044100 4.174400   | H 1.133500 3.639100 -2.511300   | H 1.182000 3.640400 -2.447700   |
| H 0.217900 -0.452700 3.958000    | H 0.105100 3.898400 -1.078300   | H 0.173000 3.905800 -1.025000   |
| H 1.757800 -2.053700 5.150800    | H -0.811900 5.061400 -3.130800  | H -0.712800 5.116200 -3.040000  |
| H 2.429800 -1.480400 3.625000    | H -1.950300 3.856900 -2.478500  | H -1.874600 3.940300 -2.417100  |
| H 1.062300 -4.182200 4.094400    | H -0.060200 3.465800 -4.895000  | H -0.011700 3.556700 -4.829800  |
| H 2.773200 -3.922800 3.794600    | H -1.827500 3.601000 -4.961800  | H -1.763000 3.720500 -4.885600  |
| H 2.89600 -3.074800 1.513200     | H -2.086500 1.475600 -3.672400  | H -2.055300 1.581900 -3.663300  |
| H 1.531100 -4.654300 1.713600    | H -1.035200 1.176200 -5.077400  | H -1.006900 1.299800 -5.055600  |
| H -0.027300 -2.959500 0.649700   | H -0.113600 0.150000 -2.919200  | H -0.122500 0.214200 -2.940700  |
| H -0.656800 -3.564600 2.201800   | H 1.001400 1.342400 -3.659400   | H 1.009300 1.395300 -3.628600   |
| H 0.931700 1.799500 -2.619300    | H -1.394600 -2.183700 2.501800  | H -1.408000 -2.173200 2.480800  |
| H 1.280900 4.091200 -3.486100    | H -2.258400 -2.659600 4.792300  | H -2.270700 -2.676900 4.740800  |
| H -4.855500 4.441700 -1.125400   | H -5.771400 -0.258800 3.969100  | H -5.818500 -0.388900 3.900700  |
| H 4.513900 2.157900 -0.256200    | H -4.917000 0.220400 1.689200   | H -4.963100 0.122900 1.651700   |
| H 2.466600 1.884000 1.591900     | H -2.708800 2.077000 1.354600   | H -2.769600 2.031900 1.381000   |
| H 3.683900 1.782100 3.731700     | H -3.909000 4.125500 0.608300   | H -4.478900 -1.785400 0.678300  |
| H 5.268700 -0.081400 4.184700    | H -5.268100 0.94700 -1.492300   | H -5.287400 4.090400 -1.425400  |
| H 5.597400 -1.853100 2.473900    | H -5.431600 1.982300 -2.831400  | H -5.419400 2.025900 -2.810300  |
| H 4.373000 -1.764800 0.336800    | H -4.240900 -0.068300 -2.089900 | H -4.235600 -0.018600 -2.113500 |
| H 4.675000 0.425600 -2.558400    | H -4.736900 -2.521700 0.602000  | H -4.748400 -2.540000 0.507400  |
| H 5.880400 -1.218200 -3.960000   | H -5.713500 -4.273400 -0.865500 | H -5.696800 -4.263600 -0.982200 |
| H 5.116300 -3.576200 -4.051200   | H -4.691600 -4.765300 -3.098100 | H -4.639500 -4.719300 -3.192200 |
| H 3.126400 -4.287300 -2.748800   | H -2.665200 -3.496600 -3.845800 | H -2.624600 -3.436700 -3.891000 |
| H 1.893100 -2.633600 -1.365900   | H -1.663600 -1.757800 -2.360900 | H -1.663000 -1.725900 -2.388500 |
| H -1.507400 1.674600 -2.316400   | H 1.661100 -2.045900 4.054000   | H 1.663400 -2.075500 4.157500   |
| H -2.417100 3.871500 -3.016200   | H 2.830400 -2.427900 4.522000   | H 2.799500 -2.489800 4.483500   |
| H -4.609800 4.647100 -2.139100   | H 5.135400 -1.514700 4.887700   | H 5.096000 -1.613700 4.877900   |
| H -5.894200 3.208800 -0.576100   | H 6.266300 -0.227500 3.247500   | H 6.247500 -0.324600 3.086700   |
| H -4.992800 1.018900 0.127200    | H 5.107900 0.156100 0.897200    | H 5.120600 0.097000 0.939600    |
| H -2.882700 1.237100 1.814300    | H 2.910200 2.058600 0.817400    | H 2.932700 2.027700 0.870500    |
| H -3.510100 0.679700 4.141800    | H 4.000300 4.052900 -0.196100   | H 4.030700 4.023200 -0.075700   |
| H -4.110700 -1.655300 4.745500   | H 6.246300 0.937200 -2.496500   | H 5.040400 3.937300 -2.350300   |
| H -4.103300 -3.419800 2.996800   | H 4.876200 1.759200 -5.766100   | H 4.942100 1.822400 -3.659500   |
| H -3.475200 -2.870300 0.673800   | H 3.801300 -0.239900 -2.751000  | H 3.857700 -0.178500 -2.713000  |
| H -1.445400 -2.945900 -1.508600  | H 1.254300 -1.955000 -2.512700  | H 1.292800 -1.990200 -2.537700  |
| H -2.464900 -4.767800 -2.849700  | H 2.052300 -3.778000 -4.029800  | H 2.051000 -3.690800 -4.065800  |
| H -4.708800 -4.483400 -3.803900  | H 4.158700 5.006700 -3.625500   | H 4.148700 4.941200 -3.580700   |
| H -5.997800 -2.383200 -3.401700  | H 5.501700 -4.388800 -1.506200  | H 5.482000 -4.374500 -1.559000  |
| H -5.002800 -0.579400 -2.037900  | H 4.746200 -2.550700 -0.011900  | H 4.745800 -2.571800 -0.048400  |

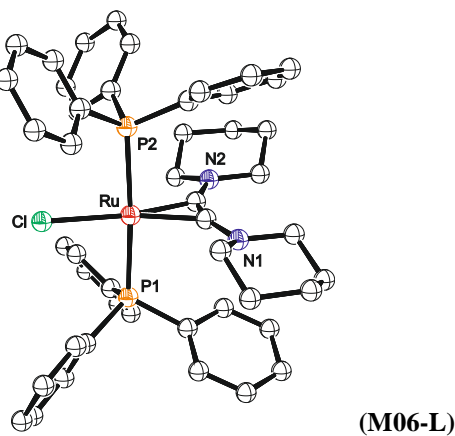

**Structure of the cation 4 (S = 1) (atom, x-, y-, z-positions in Å):**

| triplet |           |           |           |    |           |           |           |    |           |           |           |
|---------|-----------|-----------|-----------|----|-----------|-----------|-----------|----|-----------|-----------|-----------|
| M06-L   |           |           | BP86      |    |           | B3LYP     |           |    |           |           |           |
| Ru      | -0.032800 | 0.019700  | 0.633300  | Ru | 0.002300  | -0.228000 | 0.464100  | Ru | 0.008200  | -0.489000 | 0.059300  |
| Cl      | -0.035800 | 0.635000  | 2.934800  | Cl | -0.003300 | -1.388200 | 2.531800  | Cl | 0.020300  | -2.837400 | 0.477000  |
| N       | 0.420400  | 1.040100  | -2.297800 | N  | -0.317700 | -0.690700 | -2.645100 | N  | 0.337800  | 2.289800  | 1.511900  |
| N       | -0.451100 | -2.391100 | -1.294800 | N  | 0.220200  | 2.579500  | -0.991900 | N  | -0.315700 | 1.854600  | -2.053600 |
| P       | -2.411600 | 0.455100  | 0.570100  | P  | 2.429200  | -0.472000 | 0.488300  | P  | 2.469500  | -0.662100 | -0.145000 |
| P       | 2.392300  | -0.132800 | 0.740600  | P  | -2.432600 | -0.123500 | 0.661300  | P  | -2.453900 | -0.627400 | 0.307900  |
| C       | 0.071400  | 0.125700  | -1.385900 | C  | -0.068600 | 0.062500  | -1.549400 | C  | 0.053600  | 1.502000  | 0.463300  |
| C       | -0.116800 | -1.130900 | -1.022100 | C  | 0.043400  | 1.250100  | -0.945100 | C  | -0.062800 | 1.339400  | -0.848900 |
| C       | 0.479100  | 0.692000  | -3.721600 | C  | -0.274400 | -0.101400 | -0.002700 | C  | 0.418200  | 3.757000  | 1.273200  |
| C       | 1.522600  | 1.529200  | -4.445400 | C  | -1.209800 | -0.851800 | -4.965800 | C  | 1.436800  | 4.357100  | 2.350700  |
| C       | 1.306000  | 3.016100  | -4.176900 | C  | -0.932000 | -2.365800 | -4.953900 | C  | 1.183500  | 3.892000  | 3.791100  |
| C       | 1.345600  | 3.282600  | -2.677100 | C  | -1.038500 | -2.912200 | -3.518200 | C  | 1.157100  | 2.359100  | 3.858400  |
| C       | 0.278000  | 2.464400  | -1.977200 | C  | -0.098800 | -2.154900 | -2.572000 | C  | 0.122510  | 1.785600  | 2.884000  |
| C       | -0.379100 | -2.899000 | -2.670500 | C  | 0.142700  | 3.343900  | -2.257000 | C  | -0.467900 | 3.308500  | -2.260200 |
| C       | -1.381800 | -4.018200 | -2.890400 | C  | 1.154900  | 4.501400  | -2.265600 | C  | -1.508300 | 3.610200  | -3.345100 |
| C       | -1.245700 | -5.101000 | -1.828200 | C  | 1.003700  | 5.387100  | -1.015100 | C  | -1.210500 | 2.843700  | -4.640700 |
| C       | -1.398800 | -4.493800 | -0.439200 | C  | 1.222700  | 4.531900  | 0.260400  | C  | -1.108600 | 1.339300  | -4.352900 |
| C       | -0.377900 | -3.392100 | -0.224000 | C  | 0.104400  | 3.382300  | 0.243800  | C  | -0.062800 | 1.060300  | -3.270200 |
| C       | -2.634000 | 2.244300  | 0.265700  | C  | 0.310700  | -2.183800 | 0.070000  | C  | -3.030700 | -0.870500 | 2.048500  |
| C       | -1.748900 | 3.132600  | 0.895400  | C  | 2.277300  | -3.290300 | 0.557800  | C  | -2.264300 | -1.653000 | 2.929800  |
| C       | -1.839000 | 4.501400  | 0.660700  | C  | 2.707700  | -4.599200 | 0.288500  | C  | -2.657700 | -1.876200 | 4.233800  |
| C       | -2.814400 | 5.000200  | -0.201700 | C  | 3.686200  | -4.822600 | -0.472800 | C  | -3.897100 | -1.313900 | 4.689400  |
| C       | -3.711500 | 4.126700  | -0.814100 | C  | 4.603700  | -3.727500 | -0.957600 | C  | -4.668000 | -0.539200 | 3.818500  |
| C       | -3.625000 | 2.755500  | -0.582300 | C  | 4.181900  | -2.414100 | -0.687200 | C  | -4.240800 | -0.319400 | 2.506300  |
| C       | -3.293900 | -0.370900 | -0.798400 | C  | 3.363800  | 0.610000  | -0.695000 | C  | -3.423900 | 0.847200  | -0.250200 |
| C       | -3.014000 | -0.010800 | -2.126100 | C  | 3.214500  | 0.413900  | -2.083800 | C  | -3.232000 | 0.277200  | 0.410500  |
| C       | -3.606900 | -0.690400 | -3.185200 | C  | 3.902700  | 1.227800  | -2.997900 | C  | -3.982800 | 3.202300  | 0.025300  |
| C       | -4.485700 | -1.744900 | -2.935400 | C  | 4.740300  | 2.259100  | -2.535000 | C  | -4.892800 | 3.120900  | -1.034600 |
| C       | -4.767400 | -1.620800 | -2.822000 | C  | 4.087000  | 2.461100  | -2.535000 | C  | -5.065800 | 1.906900  | -1.701700 |
| C       | -4.174900 | -1.432100 | -0.558500 | C  | 4.205800  | 1.647500  | -0.203500 | C  | -4.337800 | 0.776700  | -1.312800 |
| C       | -3.389400 | 0.060400  | 2.048700  | C  | 3.201400  | -0.098600 | 2.124500  | C  | -3.180600 | -2.023300 | -0.647400 |
| C       | -4.517000 | 0.812400  | 2.394800  | C  | 4.344300  | -0.791000 | 2.576500  | C  | -4.219600 | -2.814900 | -0.137000 |
| C       | -5.285700 | 0.448300  | 3.497100  | C  | 4.832700  | -2.961000 | 3.807700  | C  | -4.758400 | -3.051200 | -0.905300 |
| C       | -4.936000 | -0.667700 | 4.255100  | C  | 4.387600  | 0.575700  | 4.594200  | C  | -4.268200 | -4.104700 | -2.188700 |
| C       | -3.812200 | -1.419600 | 3.915400  | C  | 3.247500  | 1.268000  | 4.149900  | C  | -3.232400 | -3.320600 | -2.703900 |
| C       | -3.037000 | -1.053300 | 2.819600  | C  | 2.654500  | 0.927800  | 2.924100  | C  | -2.687900 | -2.291900 | -1.934500 |
| C       | 3.112000  | 1.512600  | 0.416300  | C  | -3.279500 | -1.704400 | 0.197200  | C  | 3.329200  | -0.720200 | 1.488200  |
| C       | 2.430900  | 2.633500  | -0.915100 | C  | -2.703800 | -2.922300 | 0.629100  | C  | 2.732400  | -1.441100 | 2.537400  |
| C       | 2.928700  | 3.915100  | 0.698500  | C  | -3.331400 | -4.144200 | 0.337100  | C  | 3.366000  | -1.537500 | 3.779000  |
| C       | 4.111000  | 4.093300  | -0.018200 | C  | -4.533500 | -4.166900 | -0.392000 | C  | 4.599200  | -0.913900 | 3.990500  |
| C       | 4.800300  | 2.985000  | -0.507700 | C  | -5.111100 | -2.961000 | -0.822300 | C  | 5.200900  | -0.199000 | 2.951400  |
| C       | 1.306800  | 1.699900  | -2.812000 | C  | -4.491500 | -1.732000 | -0.528400 | C  | 4.572800  | -1.303200 | 1.705200  |
| C       | 3.118000  | -1.246500 | -0.515800 | C  | -3.259600 | 1.175300  | -0.374800 | C  | 3.300200  | 0.717800  | -1.054500 |
| C       | 3.123000  | -0.868700 | -1.867700 | C  | -3.222200 | 1.080400  | -1.786200 | C  | 3.282700  | 0.216200  | -0.513700 |
| C       | 3.595200  | -1.752900 | -2.849500 | C  | -3.805200 | 2.079200  | -2.583200 | C  | 3.877500  | 3.080100  | -1.194200 |
| C       | 3.987800  | -3.033100 | -2.459200 | C  | -4.423100 | 3.183100  | -4.988900 | C  | 4.488800  | 2.868000  | -2.935000 |
| C       | 3.985600  | -3.417800 | -1.160700 | C  | -4.458400 | 3.298900  | -0.585700 | C  | 4.505400  | -1.585000 | -2.983600 |
| C       | 3.555100  | -2.532000 | -0.173700 | C  | -3.882500 | 2.296300  | 0.216500  | C  | 3.918500  | 0.515300  | -2.298600 |
| C       | 3.103100  | -0.705100 | 2.312200  | C  | -3.041700 | 0.251500  | 2.364600  | C  | 3.038300  | -2.169500 | -1.037900 |
| C       | 2.408900  | -1.704400 | 3.024100  | C  | -2.287900 | 1.112300  | 3.190600  | C  | 2.296100  | -2.637100 | -2.135200 |
| C       | 2.973600  | -2.222900 | 4.193300  | C  | -2.762200 | 1.474600  | 4.461000  | C  | 2.730300  | -3.742300 | -2.866200 |
| C       | 4.189200  | -1.733100 | 4.669400  | C  | -3.990200 | 0.969300  | 4.922600  | C  | 3.907100  | -4.403500 | -2.502200 |
| C       | 4.857800  | -0.727900 | 3.973900  | C  | -4.740700 | 1.102900  | 4.109600  | C  | 4.646000  | -3.952300 | -1.406000 |
| C       | -0.320600 | 0.215300  | 2.797500  | C  | -4.271300 | -0.295600 | 0.634300  | C  | -4.216900 | -2.819400 | 0.577100  |
| H       | -0.516600 | 0.847700  | -4.173000 | H  | 0.769600  | -0.139300 | -4.838600 | H  | -0.577600 | 1.560000  | 4.190500  |
| H       | 0.712100  | -0.375200 | -3.790100 | H  | -0.566800 | 0.956700  | -3.919500 | H  | 0.695600  | 0.983300  | 0.342400  |
| H       | 2.523900  | 1.226600  | -4.109100 | H  | -2.260400 | -0.666100 | -4.672200 | H  | 2.448600  | 4.063100  | 2.043500  |
| H       | 1.4459700 | 1.308500  | -5.515400 | H  | -1.077400 | -0.431800 | -5.979000 | H  | 1.4494200 | 1.449300  | 2.774000  |
| H       | 0.371300  | 3.346600  | -4.600200 | H  | 0.084200  | -2.560300 | -5.351000 | H  | 0.223200  | 4.293300  | 4.145100  |
| H       | 2.108500  | 3.596600  | -4.681300 | H  | -1.638200 | -2.890200 | -5.620400 | H  | 1.955100  | 4.290900  | 4.457700  |
| H       | 1.822200  | 4.342900  | -2.457300 | H  | -0.780600 | -3.985400 | -3.484400 | H  | 0.908100  | 2.017900  | 4.869300  |
| H       | 2.327300  | -2.257800 | -2.258100 | H  | -2.078100 | -1.616200 | -2.128900 | H  | 2.179000  | -3.875400 | -4.396700 |
| H       | 0.343000  | 2.562800  | -0.888800 | H  | -0.247300 | -2.461100 | -1.523300 | H  | 0.176700  | 0.695200  | 2.851400  |
| H       | -0.730700 | 2.805900  | -2.273000 | H  | 0.961100  | -2.374300 | -2.834500 | H  | -0.889500 | 2.060900  | 3.212200  |
| H       | 0.648000  | -3.252800 | -2.862400 | H  | -0.891400 | 3.733000  | -2.369800 | H  | 0.510100  | 3.728200  | -2.543500 |
| H       | -0.575200 | -2.056100 | -3.339400 | H  | 0.398600  | 2.647400  | -3.085500 | H  | -0.769700 | 3.751300  | -1.310200 |
| H       | -1.234500 | -4.429200 | -3.894400 | H  | 1.001900  | 5.091700  | -3.186900 | H  | -1.516600 | 4.691400  | -3.524800 |
| H       | -2.395000 | -3.598200 | -2.860000 | H  | 2.177700  | 4.083300  | -2.308300 | H  | -2.501000 | 3.334300  | -2.971000 |
| H       | -0.260200 | -5.581100 | -1.912300 | H  | 0.017300  | 5.891800  | -1.032400 | H  | -0.265800 | 3.200500  | -5.074700 |
| H       | -1.908800 | -5.897700 | -1.987100 | H  | 1.676500  | 6.183700  | -1.015400 | H  | 0.942600  | 1.306500  | -3.645500 |
| H       | -2.408000 | -4.075800 | -0.326800 | H  | 2.142700  | 4.111000  | 0.334600  | H  | -2.083300 | 0.959100  | -4.022400 |
| H       | -1.274600 | -5.251800 | 0.340400  | H  | 0.951500  | 5.144300  | 1.163700  | H  | -0.831800 | 0.786500  | -5.257800 |
| H       | -0.540900 | -2.864700 | 0.724800  | H  | 0.253700  | 2.696100  | 1.095300  | H  | -0.057100 | 0.005200  | -2.984400 |
| H       | 0.642100  | -3.813300 | -0.197100 | H  | -0.929800 | 3.782500  | 0.122200  | H  | 0.942600  | 1.306500  | -3.645500 |
| H       | -0.997000 | 2.745500  | 1.582300  | H  | 1.385800  | -3.124100 | 1.171400  | H  | -1.345600 | -2.114800 | 2.585300  |
| H       | -1.147900 | 5.179000  | 1.155200  | H  | 2.135600  | -5.447200 | 0.681000  | H  | -2.098500 | -2.486800 | 4.905600  |
| H       | -2.882500 | 6.068100  | -0.388100 | H  | 4.201700  | -5.844300 | -0.681600 | H  | -4.232000 | -1.485800 | 5.708100  |
| H       | -4.403700 | 4.512300  | -1.473700 | H  | 5.514200  | -3.891200 | -1.542500 | H  | -5.606400 | -0.108200 | 4.155200  |
| H       | -4.328500 | 2.082100  | -1.066200 | H  | 4.770700  | -1.573200 | -1.065900 | H  | -4.856700 | 0.279900  | 1.844800  |
| H       | -2.349300 | 0.827000  | -2.329700 | H  | 2.584600  | -0.401500 | -2.455500 | H  | -2.567500 | 1.249200  | 1.249200  |
| H       | -3.391200 | -0.390000 | -4.207600 | H  | 3.795800  | 1.048200  | -4.073100 | H  | -3.852100 | 4.139100  | 0.559900  |
| H       | -4.954200 | -2.271400 | -3.762000 | H  | -4.953000 | -0.999900 | -0.860800 | H  | -5.467300 | 3.994100  | -1.329200 |
| H       | -5.458800 | -2.925500 | -1.419600 | H  | 5.546900  | 3.259000  | -0.783500 | H  | -5.777000 | 1.829400  | -2.518900 |
| H       | -4.410000 | -1.722800 | 0.462900  | H  | 4.346400  | 1.807900  | 0.837800  | H  | -4.500700 | -0.162100 | -1.830400 |
| H       | -4.790300 | 1.685500  | 1.806300  | H  | 4.773000  | -1        |           |    |           |           |           |
